# Supplementary material for: Multivariable integrated evaluation of model performance with the vector field evaluation diagram
Source: Copernicus journal article supplement (doi:10.5194/gmd-10-3805-2017), 2017-10-23
Supplement: Supplementary file 1 [file gmd-10-3805-2017-supplement.zip]

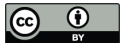

## *Supplement of*

# **Multivariable integrated evaluation of model performance with the vector field evaluation diagram**

**Zhongfeng Xu et al.**

*Correspondence to:* Zhongfeng Xu (xuzhf@tea.ac.cn)

- gmd-10-3805-2017-supplement-title-page.pdf
- code
  - BlueDarkRed19.rgb
  - GreenWhite11.rgb
  - README.txt
  - VFE.T-P.uncentered.ncl
  - VFE.metrics.T-P.uncentered.ncl
  - VFE\_diagram.ncl
  - VFE\_metrics\_table.ncl
  - WhiteBrown11.rgb
  - WhiteGreen10.rgb

The copyright of individual parts of the supplement might differ from the CC BY 3.0 License.
